# Supplementary material for: Jumping mechanisms in adult caddis flies (Insecta, Trichoptera)
Source: Oxford University Press journal article supplement (doi:10.1242/jeb.123471), 2015-09-01
Supplement: jeb123471supp.pdf [file jeb123471supp.pdf]

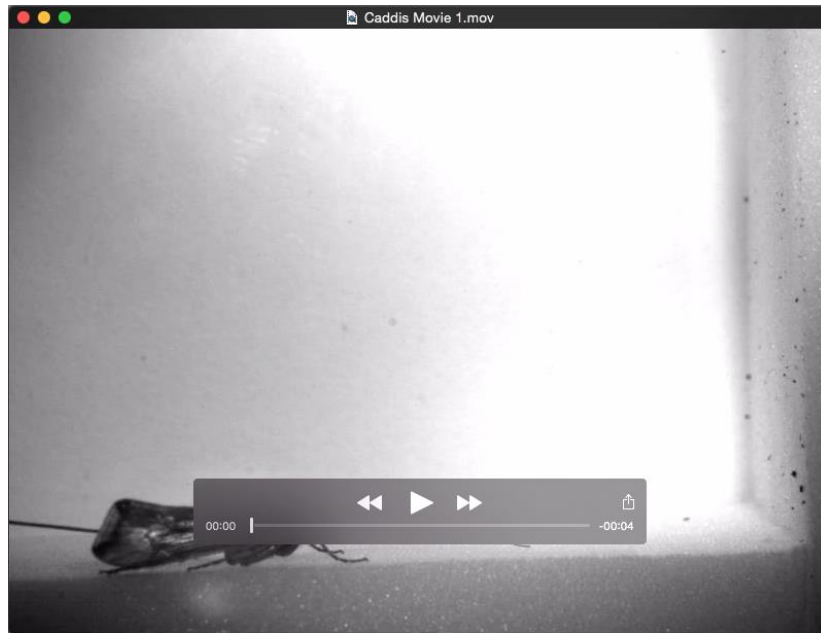

**Movie 1.** Side view of *Limnephilus marmoratus* captured at 1000 frames  $s^{-1}$  and replayed at 10 frames  $s^{-1}$ , as it jumped from the floor of the experimental chamber. This is a jump in which the wings were not opened before take-off. See also Text Figure 3.

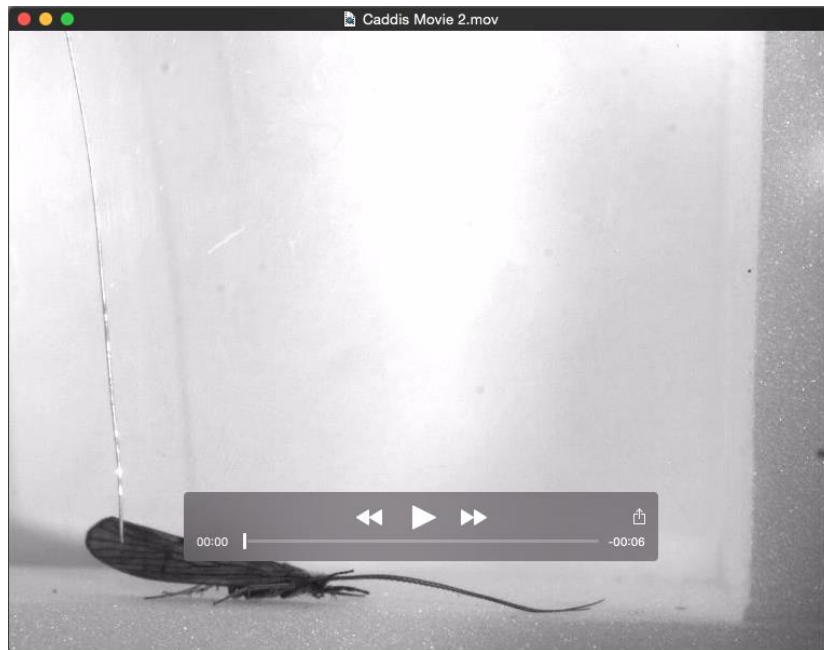

**Movie 2.** Side view of *Molanna angustata* captured at 1000 frames  $s^{-1}$  and replayed at 10 frames  $s^{-1}$ , as it jumped from the floor of the experimental chamber. This is a jump in which the wings were not opened before take-off. See also Text Figure 4.

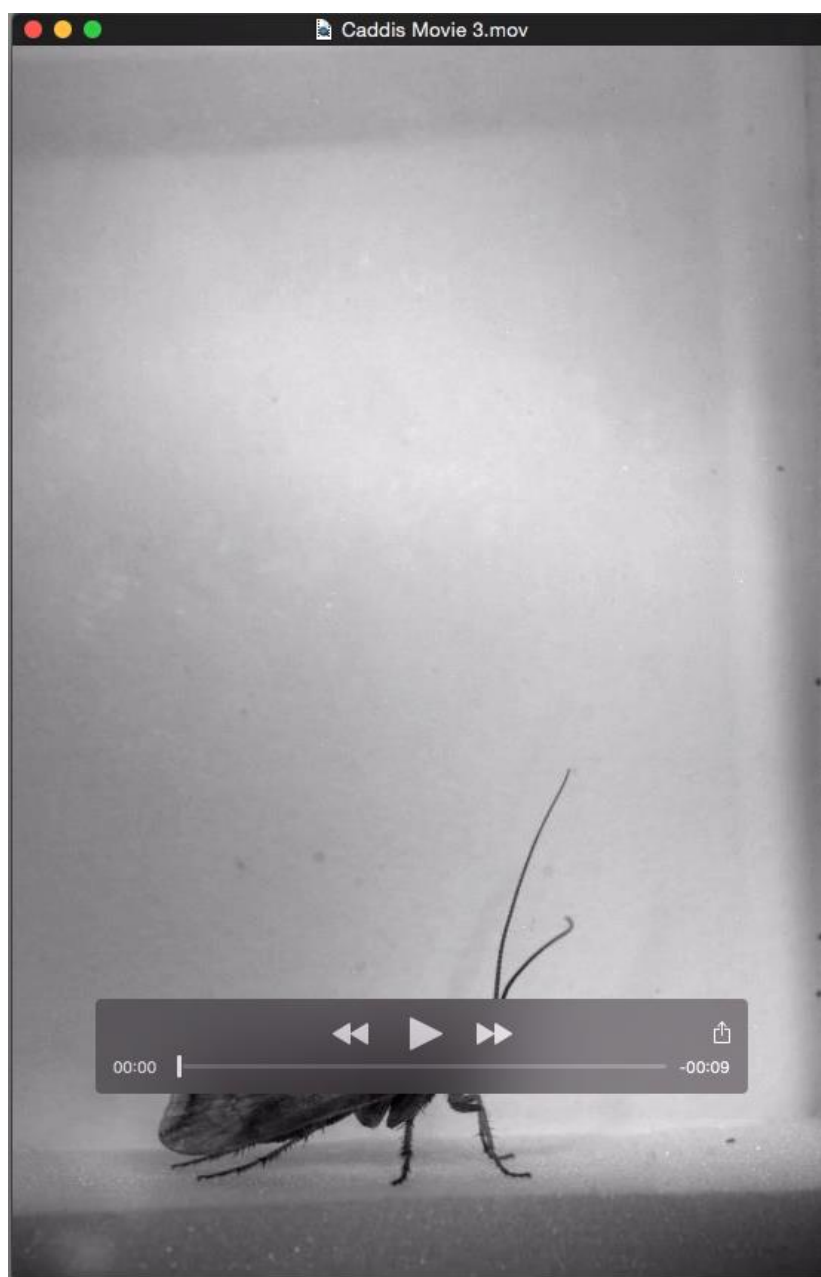

**Movie 3.** Side view of *Limnephilus marmoratus* captured at 1000 frames  $s^{-1}$  and replayed at 10 frames  $s^{-1}$ , as it jumped from the floor of the experimental chamber. This is a jump in which both the wings and legs contributed to take-off. See also Text Figure 8.
